# Supplementary material
Source: PubMed Central journal article supplement (PMC3189706)
Supplement: pr200619r_si_002.pdf [file pr200619r_si_002.pdf]

**Table S2.** Serodiagnostic Antigens for Culture+ vs Culture-RB+ populations.

| <b>Locus Tag</b> | <b>Name</b> | <b>COG(s)</b> | <b>Product Description</b>        | <b>Mean C+</b> | <b>Mean C-RB+</b> | <b>BH p value</b> |
|------------------|-------------|---------------|-----------------------------------|----------------|-------------------|-------------------|
| BMEII0173        |             | -             | hypothetical protein              | 2045.911       | 9095.142          | 0.004             |
| BMEII0029        | virB5       | -             | VirB5                             | 2504.804       | 9092.798          | 0.040             |
| BMEII0182        |             | -             | hypothetical protein              | 2011.495       | 8260.142          | 0.005             |
| BMEII0054        |             | -             | hypothetical protein              | 2351.301       | 7632.944          | 0.010             |
| BMEII1049        |             | -             | hypothetical protein              | 1417.519       | 6901.952          | 0.004             |
| BMEII0558        |             | -             | rhodocoxin reductase              | 2241.801       | 6846.522          | 0.022             |
| BMEII0532        |             | -             | hypothetical protein              | 1286.087       | 5830.910          | 0.015             |
| BMEII0892        |             | -             | hypothetical protein              | 1259.926       | 5756.133          | 0.004             |
| BMEI1502         | apl         | COG0586S      | alkaline phosphatase like protein | 1977.664       | 5390.722          | 0.040             |
| BMEII0720        |             | -             | transcriptional regulator         | 1735.819       | 5240.118          | 0.040             |

**Table S3.** Enriching analysis of COGs and computationally predicted features for serodominant, serodiagnostic and cross reactive antigens selected from comparison: Culture + vs Peruvian naïve. Significant enrichment or underrepresentation are in bold and underlined.

**S3A. COG functional categories**

| COG Definition                             | proteins<br>on chip | Serodominant |                   |                        | Serodiagnostic |                   |                     | Cross<br>reactive |                   |                     |
|--------------------------------------------|---------------------|--------------|-------------------|------------------------|----------------|-------------------|---------------------|-------------------|-------------------|---------------------|
|                                            |                     | Hits         | FoldEnrich        | p-value                | Hits           | FoldEnrich        | p-value             | Hits              | FoldEnrich        | p-value             |
| B Chromatin structure and dynamics         | 1                   | 0            | 0.0               | 1.000                  | 0              | 0.0               | 1.000               | 0                 | 0.0               | 1.000               |
| C Energy production and conversion         | 179                 | 10           | 1.4               | 0.227                  | 4              | 2.2               | 0.101               | 6                 | 1.2               | 0.642               |
| D Cell division, chromosome partitioning   | 23                  | 2            | 2.3               | 0.222                  | 0              | 0.0               | 1.000               | 2                 | 3.0               | 0.139               |
| E Amino acid transport and metabolism      | 323                 | 10           | 0.8               | 0.544                  | 1              | 0.3               | 0.249               | 9                 | 1.0               | 1.000               |
| F Nucleotide transport and metabolism      | 72                  | 1            | 0.4               | 0.527                  | 0              | 0.0               | 1.000               | 1                 | 0.5               | 0.723               |
| G Carbohydrate transport, metabolism       | 183                 | 3            | 0.4               | 0.162                  | 0              | 0.0               | 0.258               | 3                 | 0.6               | 0.489               |
| H coenzyme metabolism                      | 130                 | 4            | 0.8               | 0.817                  | 1              | 0.8               | 1.000               | 3                 | 0.8               | 1.000               |
| I Lipid metabolism                         | 107                 | 5            | 1.2               | 0.606                  | 2              | 1.9               | 0.292               | 3                 | 1.0               | 1.000               |
| J Translation, ribosomal biogenesis        | 161                 | 5            | 0.8               | 0.833                  | 0              | 0.0               | 0.407               | 5                 | 1.1               | 0.807               |
| K Transcription                            | 176                 | 1            | <b><u>0.1</u></b> | <b><u>0.014</u></b>    | 0              | 0.0               | 0.419               | 1                 | 0.2               | 0.061               |
| L DNA replication, recombination, repair   | 122                 | 3            | 0.6               | 0.629                  | 0              | 0.0               | 0.633               | 3                 | 0.9               | 1.000               |
| M Cell envelope biogenesis                 | 166                 | 13           | <b><u>2.0</u></b> | <b><u>0.012</u></b>    | 3              | 1.8               | 0.231               | 10                | <b><u>2.1</u></b> | <b><u>0.026</u></b> |
| N Cell motility and secretion              | 30                  | 4            | <b><u>3.5</u></b> | <b><u>0.027</u></b>    | 1              | 3.3               | 0.262               | 3                 | 3.5               | 0.053               |
| O Posttranslational modification, turnover | 114                 | 13           | <b><u>3.0</u></b> | <b><u>3.54E-04</u></b> | 3              | 2.6               | 0.104               | 10                | <b><u>3.1</u></b> | <b><u>0.001</u></b> |
| P Inorganic ion transport and metabolism   | 149                 | 4            | 0.7               | 0.661                  | 2              | 1.3               | 0.660               | 2                 | 0.5               | 0.443               |
| Q Secondary metabolites biosynthesis       | 63                  | 2            | 0.8               | 1.000                  | 0              | 0.0               | 1.000               | 2                 | 1.1               | 0.701               |
| R General function prediction only         | 311                 | 6            | 0.5               | 0.063                  | 2              | 0.6               | 0.765               | 4                 | 0.5               | 0.104               |
| S Function unknown                         | 223                 | 10           | 1.2               | 0.588                  | 5              | 2.2               | 0.069               | 5                 | 0.8               | 0.834               |
| T Signal transduction mechanisms           | 88                  | 3            | 0.9               | 1.000                  | 1              | 1.1               | 0.593               | 2                 | 0.8               | 1.000               |
| U Intracellular trafficking and secretion  | 48                  | 8            | <b><u>4.3</u></b> | <b><u>4.05E-04</u></b> | 3              | <b><u>6.2</u></b> | <b><u>0.012</u></b> | 5                 | <b><u>3.6</u></b> | <b><u>0.011</u></b> |
| V Defense mechanisms                       | 38                  | 3            | 2.0               | 0.179                  | 0              | 0.0               | 1.000               | 3                 | 2.8               | 0.093               |
| W Extracellular Structure                  | 2                   | 0            | 0.0               | 1.000                  | 0              | 0.0               | 1.000               | 0                 | 0.0               | 1.000               |
| Other COGs                                 | 39                  | 2            | 1.3               | 0.662                  | 0              | 0.0               | 1.000               | 2                 | 1.8               | 0.307               |
| Not in COGs                                | 543                 | 15           | 0.7               | 0.179                  | 5              | 0.9               | 1.000               | 10                | 0.6               | 0.157               |
| <b>Total</b>                               | <b>3291</b>         | <b>127</b>   |                   |                        | <b>33</b>      |                   |                     | <b>94</b>         |                   |                     |

### S3B. Computational Predictions

| Computational Predictions   | proteins    | Serodominant |            |                 | Serodiagnostic |             |                 | Cross-reactive |            |                 |
|-----------------------------|-------------|--------------|------------|-----------------|----------------|-------------|-----------------|----------------|------------|-----------------|
|                             | on chip     | Hits         | FoldEnrich | p-value         | Hits           | FoldEnrich  | p-value         | Hits           | FoldEnrich | p-value         |
| TMHMM=0                     | 2361        | 76           | <b>0.8</b> | <b>9.49E-05</b> | 18             | <b>0.7</b>  | <b>0.003</b>    | 58             | <b>0.8</b> | <b>0.007</b>    |
| TMHMM=1                     | 204         | 35           | <b>4.3</b> | <b>1.44E-14</b> | 11             | <b>5.0</b>  | <b>4.87E-06</b> | 24             | <b>4.0</b> | <b>1.21E-09</b> |
| TMHMM>1                     | 481         | 11           | <b>0.6</b> | <b>0.041</b>    | 4              | 0.8         | 0.810           | 7              | <b>0.5</b> | <b>0.038</b>    |
| TMHMM>=5                    | 297         | 2            | <b>0.2</b> | <b>5.03E-04</b> | 1              | 0.3         | 0.367           | 1              | <b>0.1</b> | <b>0.002</b>    |
| TMHMM>=10                   | 96          | 2            | 0.5        | 0.591           | 1              | 1.0         | 1.000           | 1              | 0.4        | 0.529           |
| Signal P>=0.7               | 337         | 41           | <b>3.0</b> | <b>8.46E-12</b> | 13             | <b>3.6</b>  | <b>2.16E-05</b> | 28             | <b>2.8</b> | <b>1.09E-07</b> |
| Signal P<0.7                | 2709        | 81           | <b>0.7</b> | <b>8.46E-12</b> | 20             | <b>0.7</b>  | <b>2.16E-05</b> | 61             | <b>0.8</b> | <b>1.09E-07</b> |
| pSortb Cytoplasmic          | 1146        | 32           | <b>0.7</b> | <b>0.008</b>    | 6              | <b>0.5</b>  | <b>0.019</b>    | 26             | 0.8        | 0.119           |
| pSortb Cytoplasmic Membrane | 502         | 14           | 0.7        | 0.136           | 3              | 0.6         | 0.346           | 11             | 0.7        | 0.383           |
| pSortb Extracellular        | 3           | 0            | 0.0        | 1.000           | 0              | 0.0         | 1.000           | 0              | 0.0        | 1.000           |
| pSortb Outer Membrane       | 32          | 5            | <b>3.9</b> | <b>0.008</b>    | 4              | <b>11.5</b> | <b>3.32E-04</b> | 1              | 1.1        | 0.615           |
| pSortb Periplasmic          | 88          | 12           | <b>3.4</b> | <b>1.53E-04</b> | 4              | <b>4.2</b>  | <b>0.014</b>    | 8              | <b>3.1</b> | <b>0.004</b>    |
| pSortb Unknown              | 1275        | 59           | 1.2        | 0.160           | 16             | 1.2         | 0.480           | 43             | 1.2        | 0.231           |
| pI 0-5                      | 242         | 16           | <b>1.7</b> | <b>0.039</b>    | 2              | 0.8         | 1.000           | 14             | <b>2.0</b> | <b>0.014</b>    |
| pI 5-7                      | 1470        | 65           | 1.1        | 0.268           | 17             | 1.1         | 0.729           | 48             | 1.1        | 0.284           |
| pI 7-9                      | 441         | 18           | 1.0        | 0.896           | 5              | 1.0         | 0.806           | 13             | 1.0        | 1.000           |
| pI 9-14                     | 893         | 23           | <b>0.6</b> | <b>0.008</b>    | 9              | 0.9         | 1.000           | 14             | <b>0.5</b> | <b>0.004</b>    |
| <b>Total ORFs</b>           | <b>3046</b> | <b>122</b>   |            |                 | <b>33</b>      |             |                 | <b>89</b>      |            |                 |

**Table S4. *B. abortus* proteins expression detected by mass spectrometry during log phase growth.**

| <b>ID</b>   | <b><i>B. melitensis</i></b> | <b>*Peptide Number</b> | <b>Expression condition</b> | <b>On chip</b> | <b>Protein Description</b>                                           |
|-------------|-----------------------------|------------------------|-----------------------------|----------------|----------------------------------------------------------------------|
| rho         | BMEI0003                    | 2                      | intact bacteria prep only   | Y              | Transcription termination factor Rho                                 |
| gidB        | BMEI0008                    | 1                      | intact bacteria prep only   | Y              | Glucose-inhibited division protein B                                 |
| parB        | BMEI0010                    | 3                      | intact bacteria prep only   | Y              | ParB, chromosome partitioning protein ParB                           |
| BruAb1_2028 | BMEI0015                    | 1                      | intact bacteria prep only   | Y              | ABC transporter, periplasmic substrate-binding protein, hypothetical |
| accA        | BMEI0039                    | 1                      | intact bacteria prep only   | Y              | Acetyl-CoA carboxylase alpha subunit                                 |
| rpmB        | BMEI0056                    | 1                      | intact bacteria prep only   | Y              | 50S ribosomal protein L28                                            |
| ppa         | BMEI0076                    | 3                      | intact bacteria prep only   | N              | Inorganic pyrophosphatase                                            |
| hisC        | BMEI0080                    | 1                      | intact bacteria prep only   | Y              | Histidinol-phosphate aminotransferase                                |
| etfA        | BMEI0097                    | 1                      | intact bacteria prep only   | Y              | EtfA, electron transfer flavoprotein, alpha subunit                  |
| hbd         | BMEI0099                    | 2                      | intact bacteria prep only   | Y              | 3-hydroxybutyryl-CoA dehydrogenase                                   |
| BruAb1_1919 | BMEI0123                    | 1                      | intact bacteria prep only   | Y              | Peptidyl-prolyl cis-trans isomerase                                  |
| argJ        | BMEI0124                    | 1                      | intact bacteria prep only   | Y              | Bifunctional ornithine acetyltransferase/N-acetylglutamate synthase  |
| BMEI0141    | BMEI0141                    | 2                      | intact bacteria prep only   | Y              | Dihydrolipoamide succinyl transferase                                |
| lpdA-2      | BMEI0145                    | 1                      | intact bacteria prep only   | Y              | Dihydrolipoamide dehydrogenase                                       |
| rplS        | BMEI0156                    | 3                      | intact bacteria prep only   | Y              | 50S ribosomal protein L19                                            |
| BruAb1_1881 | BMEI0158                    | 2                      | intact bacteria prep only   | Y              | Acetyltransferase, GNAT family                                       |
| sdhB        | BMEI0162                    | 1                      | intact bacteria prep only   | N              | Succinate dehydrogenase catalytic subunit                            |
| BruAb1_1867 | BMEI0173                    | 1                      | intact bacteria prep only   | Y              | Hypothetical protein BruAb1_1867                                     |
| hemC        | BMEI0176                    | 1                      | intact bacteria prep only   | Y              | Porphobilinogen deaminase                                            |
| prfA        | BMEI0191                    | 1                      | intact bacteria prep only   | Y              | Peptide chain release factor 1                                       |
| BruAb1_1844 | BMEI0194                    | 1                      | intact bacteria prep only   | Y              | Hypothetical protein BruAb1_1844                                     |
| BruAb1_1841 | BMEI0196                    | 1                      | intact bacteria prep only   | Y              | Hypothetical protein BruAb1_1841                                     |
| rplU        | BMEI0201                    | 2                      | intact bacteria prep only   | Y              | RplU, ribosomal protein L21                                          |
| BR1829      | BMEI0222                    | 2                      | intact bacteria prep only   | Y              | Carbonic anhydrase, putative                                         |
| rpsP        | BMEI0227                    | 3                      | intact bacteria prep only   | Y              | RpsP, ribosomal protein S16                                          |
| BruAb1_1785 | BMEI0244                    | 6                      | intact bacteria prep only   | Y              | Transaldolase                                                        |
| atpH        | BMEI0248                    | 2                      | intact bacteria prep only   | Y              | ATP synthase subunit D                                               |
| atpA        | BMEI0249                    | 5                      | intact bacteria prep only   | Y              | ATP synthase subunit A                                               |
| atpG        | BMEI0250                    | 1                      | intact bacteria prep only   | Y              | ATP synthase subunit C                                               |
| atpC        | BMEI0252                    | 1                      | intact bacteria prep only   | Y              | ATP synthase subunit epsilon                                         |
| BruAb1_1776 | BMEI0253                    | 1                      | intact bacteria prep only   | Y              | Transcriptional regulator, MarR family                               |
| BruAb1_1767 | BMEI0263                    | 2                      | intact bacteria prep only   | Y              | Hypothetical branched-chain amino acid ABC transporter               |
| BR1782      | BMEI0265                    | 1                      | intact bacteria prep only   | Y              | Branched-chain amino acid ABC transporter                            |
| BruAb1_1757 | BMEI0273                    | 1                      | intact bacteria prep only   | Y              | Hypothetical protein BruAb1_1757                                     |
| fdxA        | BMEI0278                    | 1                      | intact bacteria prep only   | Y              | FdxA, ferredoxin A                                                   |
| BruAb1_1737 | BMEI0289                    | 1                      | intact bacteria prep only   | Y              | Hypothetical protein BruAb1_1737                                     |
| pyk         | BMEI0292                    | 1                      | intact bacteria prep only   | Y              | Pyruvate kinase                                                      |

|             |          |   |                           |   |                                                      |
|-------------|----------|---|---------------------------|---|------------------------------------------------------|
| BruAb1_1722 | BMEI0303 | 2 | intact bacteria prep only | Y | Hypothetical protein BruAb1_1722                     |
| pgk         | BMEI0309 | 1 | intact bacteria prep only | Y | Phosphoglycerate kinase                              |
| BruAb1_1710 | BMEI0312 | 1 | intact bacteria prep only | Y | Hypothetical protein BruAb1_1710                     |
| BruAb1_1702 | BMEI0321 | 5 | intact bacteria prep only | Y | Hypothetical protein BruAb1_1702                     |
| BruAb1_1696 | BMEI0326 | 1 | intact bacteria prep only | Y | Inositol monophosphatase family protein              |
| serC        | BMEI0347 | 2 | intact bacteria prep only | Y | Phosphoserine aminotransferase                       |
| dut         | BMEI0358 | 2 | intact bacteria prep only | Y | Deoxyuridine 5'-triphosphate nucleotidohydrolase     |
| BruAb1_1649 | BMEI0366 | 1 | intact bacteria prep only | Y | Hypothetical protein BruAb1_1649                     |
| BruAb1_1648 | BMEI0368 | 3 | intact bacteria prep only | Y | Hypothetical protein BruAb1_1648                     |
| BruAb1_1644 | BMEI0372 | 1 | intact bacteria prep only | Y | Two-component response regulator                     |
| gabD        | BMEI0386 | 1 | intact bacteria prep only | Y | GabD, succinate-semialdehyde dehydrogenase           |
| BruAb1_1617 | BMEI0394 | 2 | intact bacteria prep only | Y | Short chain dehydrogenase                            |
| BruAb1_1615 | BMEI0397 | 2 | intact bacteria prep only | Y | Hypothetical protein BruAb1_1615                     |
| BruAb1_1612 | BMEI0400 | 1 | intact bacteria prep only | Y | Hypothetical protein BruAb1_1612                     |
| ctrA        | BMEI0423 | 2 | intact bacteria prep only | Y | CtrA, cell cycle transcriptional regulator CtrA      |
| BruAb1_1585 | BMEI0424 | 1 | intact bacteria prep only | Y | Hypothetical protein BruAb1_1585                     |
| hemF        | BMEI0467 | 1 | intact bacteria prep only | Y | Coproporphyrinogen III oxidase                       |
| BruAb1_1516 | BMEI0489 | 2 | intact bacteria prep only | Y | Hypothetical protein BruAb1_1516                     |
| BruAb1_1512 | BMEI0493 | 1 | intact bacteria prep only | Y | Hypothetical transcriptional regulatory protein OmpR |
| BruAb1_1506 | BMEI0498 | 1 | intact bacteria prep only | Y | Cold-shock family protein                            |
| greA        | BMEI0508 | 4 | intact bacteria prep only | Y | Transcription elongation factor GreA                 |
| aspC        | BMEI0516 | 2 | intact bacteria prep only | Y | Aspartate aminotransferase                           |
| rpoD        | BMEI0532 | 1 | intact bacteria prep only | Y | RNA polymerase sigma factor                          |
| bp26        | BMEI0536 | 1 | intact bacteria prep only | Y | Bp26                                                 |
| ftsZ        | BMEI0585 | 2 | intact bacteria prep only | Y | Cell division protein FtsZ                           |
| BruAb1_1395 | BMEI0607 | 6 | intact bacteria prep only | Y | Hypothetical protein BruAb1_1395                     |
| hflK        | BMEI0610 | 1 | intact bacteria prep only | Y | HflK, hflK protein                                   |
| ureG-2      | BMEI0644 | 1 | intact bacteria prep only | Y | UreG-2, urease accessory protein UreG                |
| ureA-2      | BMEI0649 | 1 | intact bacteria prep only | Y | UreA-2, urease, gamma subunit                        |
| map         | BMEI0719 | 1 | intact bacteria prep only | Y | Methionine aminopeptidase                            |
| BruAb1_1279 | BMEI0721 | 2 | intact bacteria prep only | Y | Hypothetical protein BruAb1_1279                     |
| gloA        | BMEI0730 | 1 | intact bacteria prep only | N | GloA, lactoylglutathione lyase                       |
| BruAb1_1264 | BMEI0735 | 2 | intact bacteria prep only | Y | Hypothetical protein BruAb1_1264                     |
| BruAb1_1258 | BMEI0740 | 1 | intact bacteria prep only | Y | CBS domain protein                                   |
| secE        | BMEI0743 | 1 | intact bacteria prep only | Y | Translocase                                          |
| rplA        | BMEI0746 | 4 | intact bacteria prep only | Y | 50S ribosomal protein L1                             |
| rplJ        | BMEI0747 | 1 | intact bacteria prep only | Y | 50S ribosomal protein L10                            |
| rpsG        | BMEI0753 | 6 | intact bacteria prep only | Y | 30S ribosomal protein S7                             |
| fusA        | BMEI0754 | 2 | intact bacteria prep only | Y | Elongation factor EF-2                               |
| rplC        | BMEI0757 | 2 | intact bacteria prep only | Y | 50S ribosomal protein L3                             |
| rplD        | BMEI0758 | 4 | intact bacteria prep only | Y | 50S ribosomal protein L4                             |
| rplB        | BMEI0760 | 1 | intact bacteria prep only | Y | 50S ribosomal protein L2                             |
| rplV        | BMEI0762 | 2 | intact bacteria prep only | Y | 50S ribosomal protein L22                            |

|             |          |    |                           |   |                                                                   |
|-------------|----------|----|---------------------------|---|-------------------------------------------------------------------|
| rpsC        | BMEI0763 | 2  | intact bacteria prep only | N | 30S ribosomal protein S3                                          |
| rplP        | BMEI0764 | 1  | intact bacteria prep only | Y | 50S ribosomal protein L16                                         |
| rpsQ        | BMEI0766 | 1  | intact bacteria prep only | Y | 30S ribosomal protein S17                                         |
| rplN        | BMEI0767 | 2  | intact bacteria prep only | Y | 50S ribosomal protein L14                                         |
| rplX        | BMEI0768 | 3  | intact bacteria prep only | Y | 50S ribosomal protein L24                                         |
| rplE        | BMEI0769 | 4  | intact bacteria prep only | Y | 50S ribosomal protein L5                                          |
| rpsN        | BMEI0770 | 2  | intact bacteria prep only | Y | 30S ribosomal protein S14                                         |
| rpsH        | BMEI0771 | 5  | intact bacteria prep only | Y | 30S ribosomal protein S8                                          |
| rpmD        | BMEI0775 | 2  | intact bacteria prep only | Y | 50S ribosomal protein L30                                         |
| rplO        | BMEI0776 | 4  | intact bacteria prep only | Y | RplO, ribosomal protein L15                                       |
| adk         | BMEI0778 | 3  | intact bacteria prep only | Y | Adenylate kinase                                                  |
| rpsM        | BMEI0779 | 5  | intact bacteria prep only | Y | 30S ribosomal protein S13                                         |
| rpoA        | BMEI0781 | 5  | intact bacteria prep only | N | DNA-directed RNA polymerase alpha subunit                         |
| BruAb1_1172 | BMEI0819 | 1  | intact bacteria prep only | Y | Glycerophosphoryl diester phosphodiesterase family protein        |
| BruAb1_1171 | BMEI0820 | 1  | intact bacteria prep only | Y | Hypothetical protein BruAb1_1171                                  |
| rpsB        | BMEI0823 | 6  | intact bacteria prep only | Y | 30S ribosomal protein S2                                          |
| gltA        | BMEI0836 | 1  | intact bacteria prep only | Y | Citrate synthase                                                  |
| BruAb1_1145 | BMEI0845 | 2  | intact bacteria prep only | Y | Rotamase family protein                                           |
| kdsA        | BMEI0850 | 1  | intact bacteria prep only | Y | 2-dehydro-3-deoxyphosphooctonate aldolase                         |
| eno         | BMEI0851 | 3  | intact bacteria prep only | Y | Enolase                                                           |
| pdhA        | BMEI0854 | 1  | intact bacteria prep only | Y | PdhA, pyruvate dehydrogenase complex, E1 component, alpha subunit |
| pdhB        | BMEI0855 | 2  | intact bacteria prep only | Y | Dihydrolipoamide acetyltransferase                                |
| ntrX        | BMEI0868 | 1  | intact bacteria prep only | Y | NtrX, nitrogen regulation protein NtrX                            |
| hfq         | BMEI0872 | 1  | intact bacteria prep only | Y | RNA-binding protein Hfq                                           |
| clpP        | BMEI0874 | 1  | intact bacteria prep only | Y | ATP-dependent Clp protease proteolytic subunit                    |
| clpX        | BMEI0875 | 1  | intact bacteria prep only | Y | ATP-dependent protease ATP-binding subunit                        |
| BruAb1_1111 | BMEI0877 | 2  | intact bacteria prep only | Y | DNA-binding protein HU                                            |
| BruAb1_1108 | BMEI0880 | 1  | intact bacteria prep only | Y | Single-stranded DNA-binding protein family                        |
| BruAb1_1099 | BMEI0888 | 2  | intact bacteria prep only | Y | Peptidyl-prolyl cis-trans isomerase, cyclophilin-type             |
| BruAb1_1060 | BMEI0931 | 1  | intact bacteria prep only | Y | Rhodanese family protein                                          |
| BruAb1_1053 | BMEI0937 | 2  | intact bacteria prep only | Y | CinA-related protein                                              |
| BruAb1_1031 | BMEI0959 | 1  | intact bacteria prep only | Y | Ferredoxin, 2Fe-2S                                                |
| BruAb1_1029 | BMEI0961 | 1  | intact bacteria prep only | Y | Hypothetical protein BruAb1_1029                                  |
| BruAb1_0953 | BMEI1030 | 1  | intact bacteria prep only | Y | Protein-L-isoaspartate O-methyltransferase, hypothetical          |
| BruAb1_0951 | BMEI1032 | 1  | intact bacteria prep only | Y | Heavy-metal-associated domain protein                             |
| BruAb1_0943 | BMEI1039 | 1  | intact bacteria prep only | Y | Aminotransferase, class V                                         |
| BruAb1_0941 | BMEI1041 | 1  | intact bacteria prep only | Y | ABC transporter, ATP-binding protein                              |
| tig         | BMEI1069 | 12 | intact bacteria prep only | Y | Trigger factor                                                    |
| BruAb1_0880 | BMEI1098 | 1  | intact bacteria prep only | Y | Transcriptional regulator, AsnC family                            |
| BruAb1_0867 | BMEI1111 | 3  | intact bacteria prep only | Y | Acyl carrier protein                                              |
| BruAb1_0866 | BMEI1112 | 1  | intact bacteria prep only | Y | 3-oxoacyl-(acyl carrier protein) synthase                         |
| BruAb1_0856 | BMEI1121 | 4  | intact bacteria prep only | Y | Hypothetical protein BruAb1_0856                                  |
| purC        | BMEI1122 | 1  | intact bacteria prep only | Y | Phosphoribosylaminoimidazole-succinocarboxamide synthase          |

|             |          |   |                           |   |                                                                      |
|-------------|----------|---|---------------------------|---|----------------------------------------------------------------------|
| BruAb1_0854 | BMEI1123 | 1 | intact bacteria prep only | Y | Phosphoribosylformylglycinamide synthase                             |
| BruAb1_0849 | BMEI1128 | 1 | intact bacteria prep only | Y | BolA-related protein                                                 |
| BruAb1_0848 | BMEI1129 | 3 | intact bacteria prep only | N | Glutaredoxin-related protein                                         |
| rpsD        | BMEI1133 | 8 | intact bacteria prep only | Y | 30S ribosomal protein S4                                             |
| nuoE        | BMEI1154 | 1 | intact bacteria prep only | Y | ATP synthase subunit E                                               |
| BruAb1_0807 | BMEI1166 | 2 | intact bacteria prep only | Y | O-acetylhomoserine sulfhydrylase                                     |
| BruAb1_0779 | BMEI1193 | 2 | intact bacteria prep only | Y | Peptidoglycan-binding protein, hypothetical                          |
| BruAb1_0764 | BMEI1206 | 1 | intact bacteria prep only | Y | Hypothetical protein BruAb1_0764                                     |
| ndk         | BMEI1256 | 4 | intact bacteria prep only | Y | Nucleoside diphosphate kinase                                        |
| BruAb1_0708 | BMEI1261 | 2 | intact bacteria prep only | Y | Leucyl aminopeptidase                                                |
| BruAb1_0704 | BMEI1264 | 3 | intact bacteria prep only | Y | Organic solvent tolerance, hypothetical                              |
| BruAb1_0677 | BMEI1288 | 1 | intact bacteria prep only | Y | Signal peptidase I                                                   |
| rpoZ        | BMEI1297 | 4 | intact bacteria prep only | Y | DNA-directed RNA polymerase omega subunit                            |
| BruAb1_0591 | BMEI1364 | 2 | intact bacteria prep only | Y | Transcriptional regulator                                            |
| BruAb1_0588 | BMEI1367 | 2 | intact bacteria prep only | Y | Fe-Mn superoxide dismutase                                           |
| BruAb1_0585 | BMEI1370 | 1 | intact bacteria prep only | Y | Hypothetical protein BruAb1_0585                                     |
| BruAb1_0584 | BMEI1371 | 3 | intact bacteria prep only | Y | Hypothetical protein BruAb1_0584                                     |
| rfbE        | BMEI1416 | 1 | intact bacteria prep only | Y | RfbE, O-antigen export system ATP-binding protein RfbE               |
| BruAb1_0530 | BMEI1429 | 1 | intact bacteria prep only | Y | Hypothetical protein BruAb1_0530                                     |
| BruAb1_0518 | BMEI1440 | 2 | intact bacteria prep only | Y | Twin-arginine translocation signal domain protein                    |
| BruAb1_0500 | BMEI1456 | 2 | intact bacteria prep only | Y | AhpC/TSA family protein                                              |
| BruAb1_0488 | BMEI1467 | 1 | intact bacteria prep only | Y | Hypothetical protein BruAb1_0488                                     |
| acpP        | BMEI1475 | 1 | intact bacteria prep only | Y | Acyl carrier protein                                                 |
| fabG        | BMEI1477 | 2 | intact bacteria prep only | Y | 3-ketoacyl-(acyl-carrier-protein) reductase                          |
| fabD        | BMEI1478 | 1 | intact bacteria prep only | Y | Acyl-carrier-protein S-malonyltransferase                            |
| rpsF        | BMEI1480 | 5 | intact bacteria prep only | Y | 30S ribosomal protein S6                                             |
| rpsR        | BMEI1481 | 1 | intact bacteria prep only | Y | 30S ribosomal protein S18                                            |
| rpII        | BMEI1483 | 9 | intact bacteria prep only | Y | 50S ribosomal protein L9                                             |
| BruAb1_0470 | BMEI1487 | 1 | intact bacteria prep only | Y | Colicin V production protein, hypothetical                           |
| BruAb1_0449 | BMEI1507 | 1 | intact bacteria prep only | Y | Hypothetical protein BruAb1_0449                                     |
| fabI-1      | BMEI1512 | 1 | intact bacteria prep only | Y | Enoyl-(acyl carrier protein) reductase                               |
| BruAb1_0415 | BMEI1539 | 2 | intact bacteria prep only | Y | Hypothetical protein BruAb1_0415                                     |
| atpF        | BMEI1543 | 1 | intact bacteria prep only | Y | ATP synthase subunit B                                               |
| BruAb1_0409 | BMEI1544 | 1 | intact bacteria prep only | Y | ATP synthase subunit B                                               |
| BruAb1_0346 | BMEI1603 | 1 | intact bacteria prep only | Y | Polysaccharide deacetylase family protein                            |
| pip         | BMEI1608 | 1 | intact bacteria prep only | Y | Pip, proline iminopeptidase                                          |
| pgi         | BMEI1636 | 2 | intact bacteria prep only | Y | Glucose-6-phosphate isomerase                                        |
| hisD        | BMEI1668 | 1 | intact bacteria prep only | Y | Histidinol dehydrogenase                                             |
| infA        | BMEI1671 | 1 | intact bacteria prep only | Y | Translation initiation factor IF-1                                   |
| BruAb1_0238 | BMEI1709 | 1 | intact bacteria prep only | Y | Oxidoreductase, short chain dehydrogenase/reductase family           |
| BruAb1_0220 | BMEI1725 | 2 | intact bacteria prep only | Y | ABC transporter, periplasmic substrate-binding protein, hypothetical |
| BruAb1_0186 | BMEI1757 | 1 | intact bacteria prep only | Y | Hypothetical protein BruAb1_0186                                     |
| grpE        | BMEI1777 | 8 | intact bacteria prep only | Y | GrpE, heat shock protein                                             |

|             |           |   |                           |   |                                                                     |
|-------------|-----------|---|---------------------------|---|---------------------------------------------------------------------|
| yfiA        | BMEI1787  | 3 | intact bacteria prep only | Y | YfiA, ribosomal subunit interface protein                           |
| ihfB        | BMEI1794  | 3 | intact bacteria prep only | Y | Integration host factor beta subunit                                |
| BruAb1_0134 | BMEI1811  | 1 | intact bacteria prep only | Y | DNA-binding response regulator                                      |
| acnA        | BMEI1855  | 1 | intact bacteria prep only | Y | Aconitate hydratase                                                 |
| BruAb1_0078 | BMEI1866  | 1 | intact bacteria prep only | Y | Hypothetical protein BruAb1_0078                                    |
| argG        | BMEI1870  | 4 | intact bacteria prep only | Y | Argininosuccinate synthase                                          |
| BruAb1_0039 | BMEI1903  | 1 | intact bacteria prep only | Y | Cytochrome c, membrane-bound                                        |
| BruAb1_0033 | BMEI1909  | 1 | intact bacteria prep only | Y | Hypothetical protein BruAb1_0033                                    |
| BruAb1_0024 | BMEI1918  | 2 | intact bacteria prep only | Y | Hypothetical protein BruAb1_0024                                    |
| rpsT        | BMEI1944  | 1 | intact bacteria prep only | Y | 30S ribosomal protein S20                                           |
| BruAb1_2157 | BMEI1945  | 1 | intact bacteria prep only | Y | Enoyl-coa hydratase                                                 |
| fabA        | BMEI1956  | 1 | intact bacteria prep only | Y | 3-hydroxydecanoyl-ACP dehydratase                                   |
| fabI-2      | BMEI1958  | 1 | intact bacteria prep only | Y | Enoyl-(acyl carrier protein) reductase                              |
| pnp         | BMEI1961  | 3 | intact bacteria prep only | Y | Pnp, polyribonucleotide nucleotidyltransferase                      |
| infB        | BMEI1965  | 1 | intact bacteria prep only | Y | Translation initiation factor IF-2                                  |
| nusA        | BMEI1967  | 8 | intact bacteria prep only | N | Transcription elongation factor NusA                                |
| BruAb1_2135 | BMEI1968  | 1 | intact bacteria prep only | Y | Hypothetical protein BruAb1_2135                                    |
| BruAb1_2123 | BMEI1980  | 5 | intact bacteria prep only | Y | DNA protection during starvation conditions                         |
| pepS        | BMEI1981  | 1 | intact bacteria prep only | Y | PepS, aminopeptidase                                                |
| dnaJ        | BMEI2001  | 1 | intact bacteria prep only | Y | DnaJ, chaperone protein DnaJ                                        |
| rpmI        | BMEI2008  | 1 | intact bacteria prep only | Y | 50S ribosomal protein L35                                           |
| accD        | BMEI2020  | 1 | intact bacteria prep only | Y | Acetyl-CoA carboxylase beta subunit                                 |
| trx-1       | BMEI2022  | 5 | intact bacteria prep only | Y | Trx-1, thioredoxin                                                  |
| BruAb1_2069 | BMEI2032  | 1 | intact bacteria prep only | Y | PTS system, IIA component                                           |
| bvrR        | BMEI2036  | 1 | intact bacteria prep only | Y | Regulatory protein BvrR                                             |
| hisE        | BMEI2040  | 1 | intact bacteria prep only | Y | Phosphoribosyl-atp pyrophosphatase                                  |
| hslU        | BMEI2048  | 1 | intact bacteria prep only | Y | ATP-dependent protease ATP-binding subunit                          |
| secB        | BMEI2055  | 1 | intact bacteria prep only | N | Export protein SecB                                                 |
| BruAb2_0084 | BMEI2009  | 2 | intact bacteria prep only | Y | keto-hydroxyglutarate-aldolase/keto-deoxy-phosphogluconate aldolase |
| galU        | BMEI2023  | 1 | intact bacteria prep only | Y | GalU, UTP--glucose-1-phosphate uridylyltransferase                  |
| BruAb2_1129 | BMEI2103  | 1 | intact bacteria prep only | Y | Hypothetical branched-chain amino acid ABC transporter              |
| dapB        | BMEI20249 | 1 | intact bacteria prep only | Y | Dihydrodipicolinate reductase                                       |
| BruAb2_0967 | BMEI20271 | 1 | intact bacteria prep only | Y | Conserved hypothetical protein TIGR00730, hypothetical              |
| BruAb2_0953 | BMEI20283 | 1 | intact bacteria prep only | Y | 3-ketoacyl-(acyl-carrier-protein) reductase                         |
| BruAb2_0952 | BMEI20284 | 1 | intact bacteria prep only | Y | ABC transporter, periplasmic substrate-binding protein              |
| BruAb2_0273 | BMEI20338 | 2 | intact bacteria prep only | Y | Lipoprotein, YaeC family                                            |
| BruAb2_0280 | BMEI20344 | 1 | intact bacteria prep only | Y | Hypothetical branched-chain amino acid ABC transporter              |
| BruAb2_0292 | BMEI20355 | 1 | intact bacteria prep only | Y | D-galactose 1-dehydrogenase, hypothetical                           |
| dgoK        | BMEI20357 | 3 | intact bacteria prep only | Y | DgoK, 2-dehydro-3-deoxygalactonokinase                              |
| BruAb2_0308 | BMEI20372 | 1 | intact bacteria prep only | N | Transcriptional regulator, hypothetical                             |
| BruAb2_0341 | BMEI20403 | 1 | intact bacteria prep only | Y | Hypothetical protein BruAb2_0341                                    |
| BMEI20409   | BMEI20409 | 1 | intact bacteria prep only | Y | Organic peroxide resistance protein                                 |
| fbaA        | BMEI20423 | 1 | intact bacteria prep only | Y | Fructose-bisphosphate aldolase                                      |



|             |           |   |                                      |   |                                                      |
|-------------|-----------|---|--------------------------------------|---|------------------------------------------------------|
| BruAb2_0362 | BMEII0424 | 2 | intact bacteria prep only            | Y | Ribose-5-phosphate isomerase B                       |
| BruAb2_0445 | BMEII0503 | 1 | intact bacteria prep only            | Y | Hypothetical protein BruAb2_0445                     |
| BruAb2_0453 | BMEII0512 | 2 | intact bacteria prep only            | Y | 6-phosphogluconolactonase                            |
| zwf         | BMEII0513 | 5 | intact bacteria prep only            | Y | Glucose-6-phosphate 1-dehydrogenase                  |
| gcvH        | BMEII0560 | 1 | intact bacteria prep only            | Y | Glycine cleavage system protein H                    |
| ahpC        | BMEII0577 | 5 | intact bacteria prep only            | Y | AhpC, alkyl hydroperoxide reductase C                |
| ahpD        | BMEII0578 | 2 | intact bacteria prep only            | Y | AhpD, alkyl hydroperoxide reductase D                |
| BruAb2_0553 | BMEII0607 | 1 | intact bacteria prep only            | Y | Iron compound ABC transporter, periplasmic iron      |
| BruAb2_0559 | BMEII0612 | 1 | intact bacteria prep only            | Y | Branched-chain amino acid aminotransferase           |
| ugpB        | BMEII0625 | 1 | intact bacteria prep only            | Y | UgbB, glycerol-3-phosphate ABC transporter           |
| BruAb2_0603 | BMEII0652 | 1 | intact bacteria prep only            | Y | Hypothetical protein BruAb2_0603                     |
| rpmG        | BMEII0661 | 1 | intact bacteria prep only            | Y | 50S ribosomal protein L33                            |
| BruAb2_0628 | BMEII0673 | 3 | intact bacteria prep only            | Y | Metal-dependent hydrolase                            |
| BruAb2_0649 | BMEII0692 | 1 | intact bacteria prep only            | N | Hypothetical protein BruAb2_0649                     |
| bfr         | BMEII0704 | 2 | intact bacteria prep only            | Y | Bfr, bacterioferritin                                |
| BruAb2_0662 | BMEII0707 | 1 | intact bacteria prep only            | Y | RrF2 family protein                                  |
| BruAb2_0698 | BMEII0746 | 1 | intact bacteria prep only            | Y | Dihydrolipoamide acetyltransferase                   |
| ybgT        | BMEII0758 | 1 | intact bacteria prep only            | Y | YbgT                                                 |
| BruAb2_0745 | BMEII0787 | 1 | intact bacteria prep only            | Y | Hypothetical protein BruAb2_0745                     |
| BRA0471     | BMEII0794 | 1 | intact bacteria prep only            | Y | Transporter, putative                                |
| serA-2      | BMEII0813 | 1 | intact bacteria prep only            | Y | SerA-2, D-3-phosphoglycerate dehydrogenase           |
| katA        | BMEII0893 | 1 | intact bacteria prep only            | Y | KatA, catalase                                       |
| guaB        | BMEII0896 | 1 | intact bacteria prep only            | Y | Inositol-5-monophosphate dehydrogenase               |
| BruAb2_0845 | BMEII0913 | 2 | intact bacteria prep only            | Y | Hypothetical protein BruAb2_0845                     |
| BruAb2_0856 | BMEII0924 | 3 | intact bacteria prep only            | Y | Hypothetical protein BruAb2_0856                     |
| minD        | BMEII0926 | 1 | intact bacteria prep only            | N | MinD, septum site-determining protein                |
| BRA0266     | BMEII0982 | 1 | intact bacteria prep only            | Y | Sugar ABC transporter, ATP-binding protein, putative |
| BruAb2_0209 | BMEII1031 | 2 | intact bacteria prep only            | Y | Hypothetical protein BruAb2_0209                     |
| hisS        | BMEII1056 | 1 | intact bacteria prep only            | Y | Histidyl-trna synthetase                             |
| BruAb2_0178 | BMEII1060 | 1 | intact bacteria prep only            | Y | Oxidoreductase, aldo/keto reductase family           |
| BruAb2_0117 | BMEII1116 | 1 | intact bacteria prep only            | Y | Transcriptional regulator, LuxR family               |
| etfB        | BMEI0096  | 3 | intact bacteria & cell envelope prep | Y | Electron transfer flavoprotein, beta subunit         |
| BMEI1305    | BMEI0135  | 2 | intact bacteria & cell envelope prep | Y | Lipoprotein                                          |
| BMEI0137    | BMEI0137  | 9 | intact bacteria & cell envelope prep | Y | Malate Dehydrogenase                                 |
| sucC        | BMEI0138  | 6 | intact bacteria & cell envelope prep | Y | Succinyl-CoA synthetase subunit beta                 |
| BMEI0139    | BMEI0139  | 6 | intact bacteria & cell envelope prep | Y | Succinyl-CoA ligase alpha chain                      |
| clpB        | BMEI0195  | 3 | intact bacteria & cell envelope prep | N | ATP-dependent clp protease, ATP-binding Subunit ClpB |
| BruAb1_1816 | BMEI0214  | 2 | intact bacteria & cell envelope prep | Y | Carboxyl-terminal protease                           |
| atpD        | BMEI0251  | 4 | intact bacteria & cell envelope prep | Y | ATP synthase F1, beta subunit                        |
| BMEI0310    | BMEI0310  | 4 | intact bacteria & cell envelope prep | Y | Glyceraldehyde 3-phosphate dehydrogenase             |
| tolB        | BMEI0339  | 5 | intact bacteria & cell envelope prep | Y | Protein tolB precursor                               |
| BruAb1_1680 | BMEI0340  | 7 | intact bacteria & cell envelope prep | Y | Lipoprotein, Pal family                              |
| BMEI0393    | BMEI0393  | 4 | intact bacteria & cell envelope prep | Y | D-ribose-binding periplasmic protein                 |

|             |          |    |                                      |   |                                                        |
|-------------|----------|----|--------------------------------------|---|--------------------------------------------------------|
| BMEI0396    | BMEI0396 | 1  | intact bacteria & cell envelope prep | N | Dihydroxyacetone kinase                                |
| BruAb1_1583 | BMEI0425 | 2  | intact bacteria & cell envelope prep | Y | Hypothetical protein BruAb1_1583                       |
| BMEI0441    | BMEI0441 | 3  | intact bacteria & cell envelope prep | Y | Glycine betaine/l-proline-binding protein prox         |
| BMEI0451    | BMEI0451 | 2  | intact bacteria & cell envelope prep | Y | 2-isopropylmalate synthase                             |
| BMEI0481    | BMEI0481 | 3  | intact bacteria & cell envelope prep | Y | LSU ribosomal protein L25P                             |
| BMEI0535    | BMEI0535 | 1  | intact bacteria & cell envelope prep | Y | Hypothetical Protein                                   |
| BruAb1_1464 | BMEI0542 | 4  | intact bacteria & cell envelope prep | Y | Hypothetical protein BruAb1_1464                       |
| BruAb1_1463 | BMEI0543 | 5  | intact bacteria & cell envelope prep | Y | Choloylglycine hydrolase family protein                |
| BMEI0587    | BMEI0587 | 3  | intact bacteria & cell envelope prep | Y | ComI, competence lipoprotein                           |
| BruAb1_1334 | BMEI0668 | 3  | intact bacteria & cell envelope prep | Y | Hypothetical acid-shock protein                        |
| BMEI0673    | BMEI0673 | 4  | intact bacteria & cell envelope prep | Y | Thiosulfate-binding protein                            |
| BMEI0687    | BMEI0687 | 1  | intact bacteria & cell envelope prep | Y | Hypothetical Protein                                   |
| BMEI0711    | BMEI0711 | 3  | intact bacteria & cell envelope prep | Y | Hypothetical Protein                                   |
| BMEI0723    | BMEI0723 | 4  | intact bacteria & cell envelope prep | Y | Hypothetical Protein                                   |
| tuf         | BMEI0742 | 10 | intact bacteria & cell envelope prep | Y | Protein Translation Elongation Factor Tu (EF-TU)       |
| nusG        | BMEI0744 | 2  | intact bacteria & cell envelope prep | Y | Transcription antitermination protein NusG             |
| rplK        | BMEI0745 | 3  | intact bacteria & cell envelope prep | Y | 50S ribosomal protein L11                              |
| rplL        | BMEI0748 | 3  | intact bacteria & cell envelope prep | Y | 50S ribosomal protein L7/L12                           |
| rpsJ        | BMEI0756 | 2  | intact bacteria & cell envelope prep | Y | 30S ribosomal protein S10                              |
| BMEI0759    | BMEI0759 | 2  | intact bacteria & cell envelope prep | Y | LSU ribosomal protein L23P                             |
| rpsS        | BMEI0761 | 4  | intact bacteria & cell envelope prep | Y | 30S ribosomal protein S19                              |
| rpmC        | BMEI0765 | 2  | intact bacteria & cell envelope prep | Y | RpmC, ribosomal protein L29                            |
| rplR        | BMEI0773 | 1  | intact bacteria & cell envelope prep | Y | Ribosomal protein L18                                  |
| rpsE        | BMEI0774 | 2  | intact bacteria & cell envelope prep | Y | 30S ribosomal protein S5                               |
| rplQ        | BMEI0782 | 2  | intact bacteria & cell envelope prep | Y | Ribosomal protein L17                                  |
| BMEI0786    | BMEI0786 | 6  | intact bacteria & cell envelope prep | Y | Outer membrane protein                                 |
| BR1199      | BMEI0791 | 1  | intact bacteria & cell envelope prep | Y | Isocitrate dehydrogenase, NADP-dependent               |
| BR1194      | BMEI0796 | 2  | intact bacteria & cell envelope prep | Y | TRAP transporter solute receptor, TAXI family          |
| BruAb1_1188 | BMEI0805 | 3  | intact bacteria & cell envelope prep | Y | Hypothetical protein BruAb1_1188                       |
| tsf         | BMEI0824 | 3  | intact bacteria & cell envelope prep | Y | Protein Translation Elongation Factor Ts (EF-Ts)       |
| frr         | BMEI0826 | 3  | intact bacteria & cell envelope prep | Y | Ribosome Recycling Factor (RRF)                        |
| BMEI0830    | BMEI0830 | 15 | intact bacteria & cell envelope prep | Y | Outer membrane protein                                 |
| BMEI0887    | BMEI0887 | 2  | intact bacteria & cell envelope prep | Y | Probable peptidyl-prolyl cis-trans isomerase precursor |
| BMEI0933    | BMEI0933 | 2  | intact bacteria & cell envelope prep | Y | Cysteine synthase                                      |
| BMEI0973    | BMEI0973 | 4  | intact bacteria & cell envelope prep | Y | Hypothetical Protein                                   |
| BMEI1092    | BMEI1092 | 2  | intact bacteria & cell envelope prep | Y | Hypothetical protein                                   |
| BMEI1169    | BMEI1169 | 4  | intact bacteria & cell envelope prep | Y | SSU ribosomal protein S9P                              |
| BMEI1179    | BMEI1179 | 2  | intact bacteria & cell envelope prep | Y | Integration host factor subunit alpha                  |
| BMEI1184    | BMEI1184 | 2  | intact bacteria & cell envelope prep | Y | Small protein a                                        |
| ribH        | BMEI1187 | 1  | intact bacteria & cell envelope prep | Y | Riboflavin synthase subunit beta                       |
| BMEI1201    | BMEI1201 | 1  | intact bacteria & cell envelope prep | Y | Hypothetical Cytosolic Protein                         |
| BMEI1214    | BMEI1214 | 2  | intact bacteria & cell envelope prep | Y | Hypothetical Protein                                   |
| BMEI1242    | BMEI1242 | 3  | intact bacteria & cell envelope prep | Y | Hypothetical Membrane Spanning Protein                 |

|             |          |    |                                      |   |                                                                     |
|-------------|----------|----|--------------------------------------|---|---------------------------------------------------------------------|
| omp2a       | BMEI1305 | 4  | intact bacteria & cell envelope prep | Y | Porin                                                               |
| BMEI1311    | BMEI1311 | 1  | intact bacteria & cell envelope prep | Y | Hypothetical Protein                                                |
| BruAb1_0635 | BMEI1330 | 8  | intact bacteria & cell envelope prep | Y | Immunoreactive stress response protein                              |
| BMEI1369    | BMEI1369 | 2  | intact bacteria & cell envelope prep | Y | Protein ybis                                                        |
| BMEI1449    | BMEI1449 | 3  | intact bacteria & cell envelope prep | Y | Hypothetical Protein                                                |
| BMEI1584    | BMEI1584 | 6  | intact bacteria & cell envelope prep | Y | Invasion protein B homolog BMEI1584 precursor                       |
| BMEI1716    | BMEI1716 | 4  | intact bacteria & cell envelope prep | Y | Trehalose/maltose binding protein                                   |
| BruAb1_0066 | BMEI1879 | 2  | intact bacteria & cell envelope prep | Y | Hypothetical protein BruAb1_0066                                    |
| BMEI1962    | BMEI1962 | 1  | intact bacteria & cell envelope prep | Y | SSU ribosomal protein S15P                                          |
| dnaK        | BMEI2002 | 12 | intact bacteria & cell envelope prep | N | Chaperone protein dnaK                                              |
| BMEI0069    | BMEI0069 | 1  | intact bacteria & cell envelope prep | Y | Leu-, Ile-, Val-, Thr-, and Ala-binding protein                     |
| BMEI0248    | BMEI0248 | 3  | intact bacteria & cell envelope prep | Y | Phosphoglyceromutase                                                |
| BMEI0435    | BMEI0435 | 5  | intact bacteria & cell envelope prep | Y | D-ribose-binding periplasmic protein                                |
| BMEI0581    | BMEI0581 | 4  | intact bacteria & cell envelope prep | Y | Superoxide dismutase [Cu-Zn] precursor                              |
| BMEI0584    | BMEI0584 | 2  | intact bacteria & cell envelope prep | Y | Iron binding protein FbpA precursor-like protein                    |
| P61711      | BMEI0589 | 1  | intact bacteria & cell envelope prep | Y | E Chain E, Crystal Structure Of Lumazine Synthase                   |
| BMEI0590    | BMEI0590 | 5  | intact bacteria & cell envelope prep | Y | Immunogenic 39-kDa protein                                          |
| BMEI0601    | BMEI0601 | 2  | intact bacteria & cell envelope prep | Y | Cystine-binding periplasmic protein                                 |
| BMEI0734    | BMEI0734 | 3  | intact bacteria & cell envelope prep | Y | Periplasmic oligopeptide-binding protein                            |
| BMEI0735    | BMEI0735 | 2  | intact bacteria & cell envelope prep | Y | Periplasmic oligopeptide-binding protein                            |
| BMEI0885    | BMEI0885 | 1  | intact bacteria & cell envelope prep | N | 19 kDa periplasmic protein                                          |
| BMEI0983    | BMEI0983 | 7  | intact bacteria & cell envelope prep | Y | D-galactose-binding periplasmic protein                             |
| BMEI1042    | BMEI1042 | 2  | intact bacteria & cell envelope prep | Y | Hypothetical protein                                                |
| groES       | BMEI1047 | 5  | intact bacteria & cell envelope prep | Y | Co-chaperonin GroES                                                 |
| groEL       | BMEI1048 | 12 | intact bacteria & cell envelope prep | Y | Chaperonin GroEL                                                    |
| Q8YJL2      | BMEI0071 | 3  | cell envelope prep only              | Y | AF527607_1 hypothetical protein                                     |
| BMEI0223    | BMEI0223 | 1  | cell envelope prep only              | Y | Membrane-bound lytic murein transglycosylase b                      |
| BMEI0243    | BMEI0243 | 1  | cell envelope prep only              | Y | Hypothetical Protein                                                |
| BMEI0402    | BMEI0402 | 5  | cell envelope prep only              | Y | 31 kDa outer-membrane immunogenic protein                           |
| BMEI0454    | BMEI0454 | 5  | cell envelope prep only              | Y | Outer membrane protein w                                            |
| BMEI0473    | BMEI0473 | 1  | cell envelope prep only              | Y | Ubiquinol-cytochrome c reductase iron-sulfur subunit                |
| BMEI0484    | BMEI0484 | 1  | cell envelope prep only              | Y | Hypothetical Protein                                                |
| BruAb1_1501 | BMEI0504 | 1  | cell envelope prep only              | Y | Hypothetical protein BruAb1_1501                                    |
| BMEI0657    | BMEI0657 | 9  | cell envelope prep only              | Y | Metal chelate outer membrane receptor                               |
| BMEI0680    | BMEI0680 | 1  | cell envelope prep only              | Y | Protein translocase subunit secD / protein translocase subunit secE |
| BR1321      | BMEI0683 | 1  | cell envelope prep only              | Y | Conserved hypothetical protein                                      |
| BMEI0717    | BMEI0717 | 7  | cell envelope prep only              | Y | 22 kDa outer membrane protein                                       |
| BruAb1_1278 | BMEI0722 | 1  | cell envelope prep only              | Y | Conserved hypothetical protein                                      |
| BMEI0772    | BMEI0772 | 1  | cell envelope prep only              | N | LSU ribosomal protein L6P                                           |
| moeA        | BMEI0841 | 1  | cell envelope prep only              | Y | MoeA, molybdopterin biosynthesis protein MoeA                       |
| BMEI0857    | BMEI0857 | 1  | cell envelope prep only              | Y | Dihydrolipoyl dehydrogenase                                         |
| BMEI0962    | BMEI0962 | 3  | cell envelope prep only              | Y | Membrane lipoprotein lipid attachment site containing protein       |
| glnB        | BMEI0978 | 1  | cell envelope prep only              | Y | GlnB, nitrogen regulatory protein P-II                              |

|             |          |    |                         |   |                                                   |
|-------------|----------|----|-------------------------|---|---------------------------------------------------|
| BruAb1_0926 | BMEI1055 | 1  | cell envelope prep only | Y | Penicillin-binding protein 1A, hypothetical       |
| BruAb1_0907 | BMEI1072 | 4  | cell envelope prep only | Y | Hypothetical protein BruAb1_0907                  |
| BruAb1_0841 | BMEI1135 | 1  | cell envelope prep only | Y | Hypothetical protein BruAb1_0841                  |
| BMEI1165    | BMEI1165 | 1  | cell envelope prep only | Y | Hypothetical Membrane Spanning Protein            |
| omp25       | BMEI1249 | 9  | cell envelope prep only | Y | Immunogenic protein                               |
| BMEI1265    | BMEI1265 | 3  | cell envelope prep only | Y | Survival protein sura                             |
| omp2b       | BMEI1306 | 2  | cell envelope prep only | Y | Porin, omp2b                                      |
| BruAb1_0632 | BMEI1328 | 1  | cell envelope prep only | Y | Sensor histidine kinase                           |
| BMEI1335    | BMEI1335 | 2  | cell envelope prep only | Y | 17 kd surface antigen                             |
| BMEI1494    | BMEI1494 | 1  | cell envelope prep only | Y | Hypothetical Protein                              |
| BMEI1531    | BMEI1531 | 1  | cell envelope prep only | Y | Tetratricopeptide repeat family protein           |
| ccoO        | BMEI1565 | 1  | cell envelope prep only | Y | CcoO, cytochrome c oxidase, cbb3-type, subunit II |
| BMEI1594    | BMEI1594 | 1  | cell envelope prep only | Y | Hypothetical Protein                              |
| BMEI1723    | BMEI1723 | 1  | cell envelope prep only | Y | NADP-specific glutamate dehydrogenase             |
| BMEI1760    | BMEI1760 | 1  | cell envelope prep only | Y | Hypothetical Protein                              |
| BruAb1_0116 | BMEI1829 | 7  | cell envelope prep only | Y | Outer membrane protein, hypothetical              |
| BruAb1_0115 | BMEI1830 | 1  | cell envelope prep only | Y | Outer membrane protein, hypothetical              |
| BruAb1_0086 | BMEI1859 | 1  | cell envelope prep only | Y | Hypothetical membrane protein                     |
| BMEI1890    | BMEI1890 | 1  | cell envelope prep only | Y | Transporter, putative                             |
| BMEI1893    | BMEI1893 | 1  | cell envelope prep only | Y | Protein ybis                                      |
| BMEI1895    | BMEI1895 | 3  | cell envelope prep only | Y | Outer membrane protein                            |
| BMEI1915    | BMEI1915 | 3  | cell envelope prep only | Y | SSU ribosomal protein S1P                         |
| BMEI1948    | BMEI1948 | 1  | cell envelope prep only | Y | Cytosol aminopeptidase                            |
| BR2146      | BMEI1982 | 1  | cell envelope prep only | Y | Lipoprotein, putative                             |
| BR2145      | BMEI1983 | 1  | cell envelope prep only | Y | Lipoprotein, putative                             |
| BMEI1989    | BMEI1989 | 1  | cell envelope prep only | Y | Phosphate-binding periplasmic protein             |
| omp10       | BMEI0017 | 1  | cell envelope prep only | Y | Lipoprotein Omp10                                 |
| BMEI0105    | BMEI0105 | 15 | cell envelope prep only | Y | Iron-regulated outer membrane protein FrpB        |
| BMEI0297    | BMEI0297 | 2  | cell envelope prep only | Y | Outer membrane protein nosa                       |
| BMEI0334    | BMEI0334 | 3  | cell envelope prep only | Y | Tetratricopeptide repeat family protein           |
| BRA0875     | BMEI0419 | 1  | cell envelope prep only | Y | GTP-binding protein TypA                          |
| rbsC-3      | BMEI0433 | 1  | cell envelope prep only | Y | Ribose ABC transporter, permease protein          |
| BruAb2_0497 | BMEI0552 | 1  | cell envelope prep only | Y | Immunoreactive 14 kDa protein BA14k               |
| Omp31       | BMEI0844 | 1  | cell envelope prep only | Y | Outer membrane protein Omp31                      |
| BruAb2_0561 | -        | 2  | cell envelope prep only |   | Hypothetical protein                              |

\*peptide number data was from *in vitro* growth of *B. abortus* detected by mass spectrometry. Samples were processed for intact bacteria or cell envelope preparations. When a protein was detected in both preps, an average number of peptide identified was used for that protein.
